# Supplementary material for: Effect of football activity and physical fitness on information processing, inhibitory control and working memory in adolescents
Source: Springer Nature journal article supplement (doi:10.1186/s12889-020-09484-w), 2020-09-14
Supplement: MOESM1 [file 18377498]

# Stroop Test – Congruent Level

1A)

Quickly choose the word that matches the word on center screen. Use the arrow keys to select between the two choices on either side of the large word in the center. We will begin with 6 practice runs.

Press space to begin.

On-screen instructions that were provided at the start of each test. These informed participants that they had 6 practice runs (with feedback) before commencing with the real test (no feedback).

1B)

BLUE  
←

RED

RED  
→

Visual representation of the stimuli presented during the congruent level. The middle word (RED) is the target. Participants were instructed to identify the target using either the right (middle finger) or left arrows (index finger) on the laptop keys.

For this particular example, the correct response is the right arrow. Participants were instructed to respond as quickly as possible, whilst selecting the correct response.

# Stroop Test – Incongruent Level

C)

Quickly choose the colour in which the word on center screen is written, rather than the colour that the word names. Most people find this level the hardest. You probably will take more time for each word, and may frequently make the mistake of choosing the word itself, rather than the colour in which the word appears. Use the arrow keys to select between the two choices on either side of the large word in the center. We will begin with 6 practice runs.

Press space to begin.

On-screen instructions that were provided at the start of each test. These informed participants that they had 6 practice runs (with feedback) before commencing with the real test (no feedback).

D)

RED  
←

RED

GREEN  
→

Visual representation of the stimuli presented during the incongruent level. The *colour ink* of the middle word (GREEN) is the target. Participants were instructed to identify the target using either the right (middle finger) or left arrows (index finger) on the laptop keys.

For this particular example, the correct response is the right arrow. Participants were instructed to respond as quickly as possible, whilst selecting the correct response.

# Sternberg Paradigm – All levels

N.B. The example here is for the five-letter level. The same principles apply to the other levels, only the number of stimuli to remember differs (i.e. 1 item or 3 items)

E)

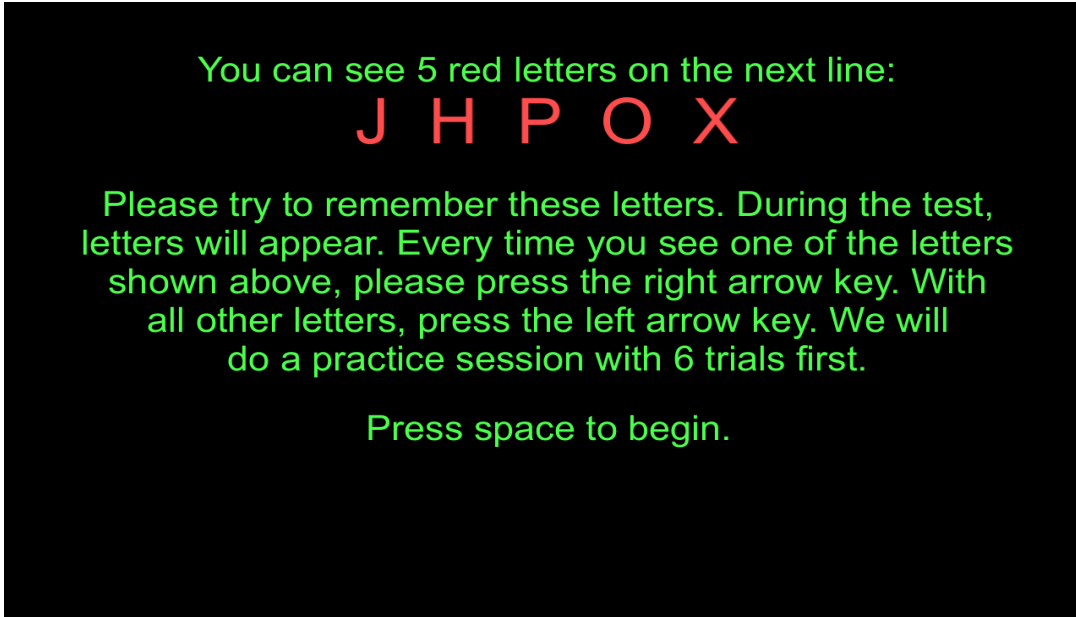

On-screen instructions that were provided at the start of each test. These informed participants that they had 6 practice runs (with feedback) before commencing with the real test (no feedback).

F)

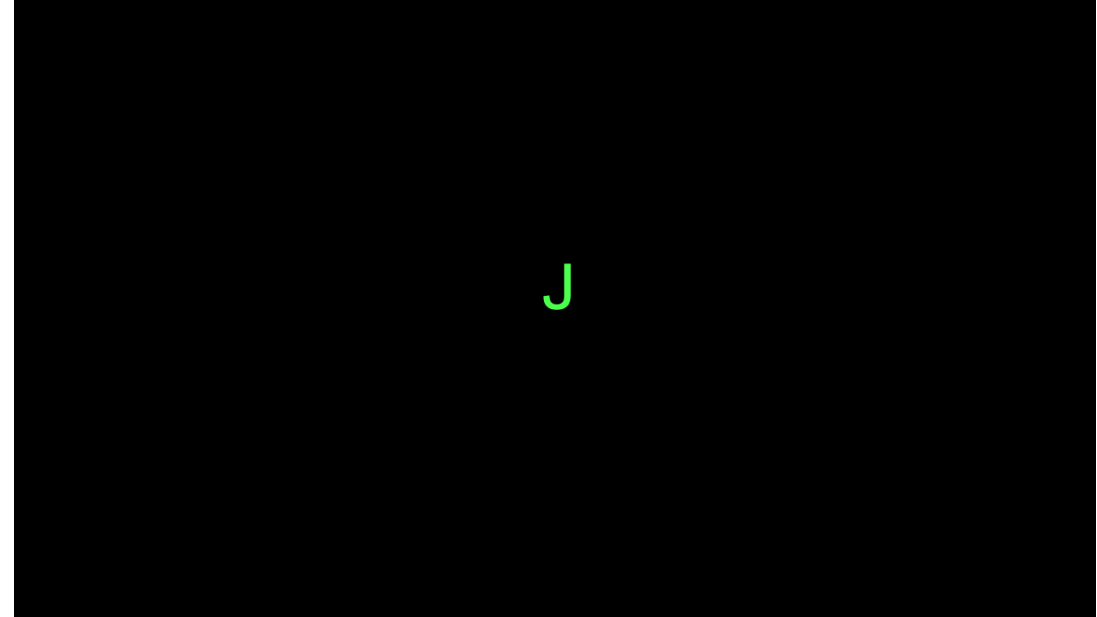

Visual representation of the stimuli presented during the Sternberg Paradigm. Participants were required to press the right arrow (middle finger), if the on screen item was their target stimuli, or the left arrow (index finger) if it was any other item.

For this particular example, as “J” is a target item (See E), the correct response would be the right arrow. Participants were instructed to respond as quickly as possible, whilst selecting the correct response.
